# Supplementary material for: The TaWRKY22–TaCOPT3D Pathway Governs Cadmium Uptake in Wheat
Source: Preprints.org preprint supplement (doi:10.20944/preprints202208.0093.v1), 2022-08-04

Supplementary figure legends

Fig. S1

(a) Schematics of the plant expression vector used in the wheat transformation. (b) Identification of transgenic wheat lines using PCR. (c) Gene expression of *TaCOPT3D* in WT and transgenic lines. **indicates a significant difference at *P* ≤ 0.01.

.

Supplementary Fig. S1

(a)


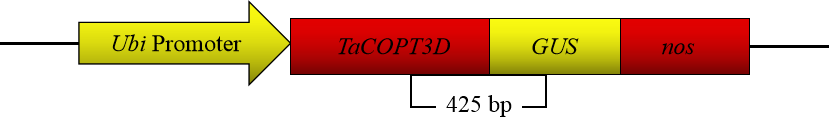


(b)


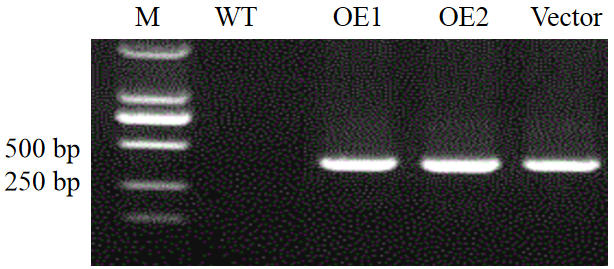


(c)


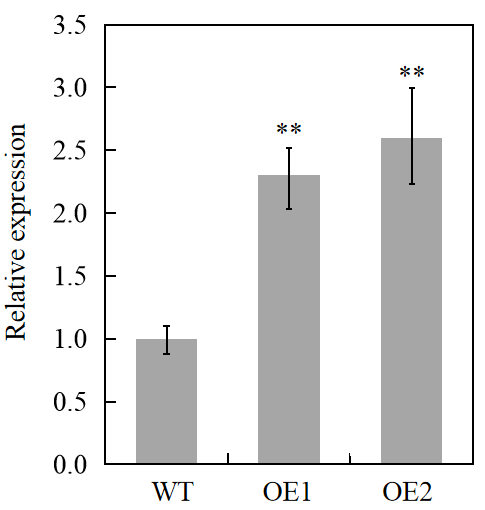

Supplement: Supplementary file 1 [file supplementary]
